# Supplementary material for: Polysiphonia japonica Extract Attenuates Palmitate-Induced Toxicity and Enhances Insulin Secretion in Pancreatic Beta-Cells
Source: PubMed Central journal article supplement (PMC6230388; doi:10.1155/2018/4973851), 2018-10-28

Graphic summary

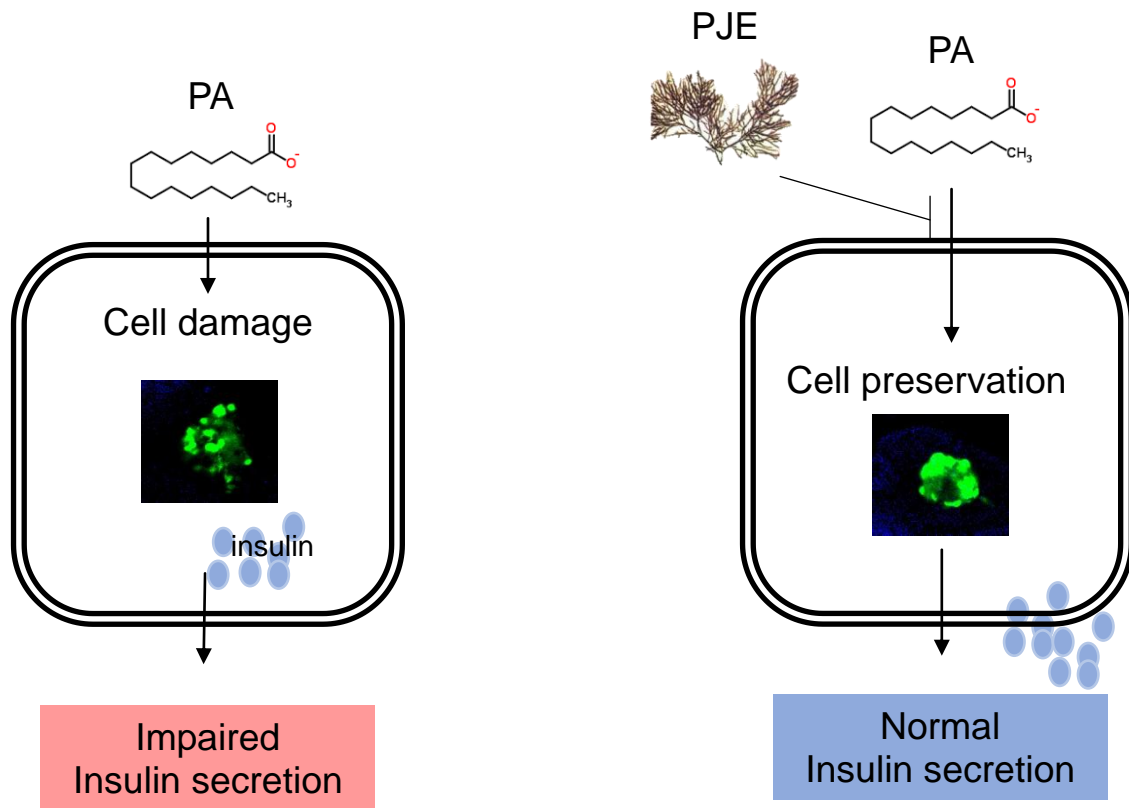

Supplement: 4973851.f1.pdf [file 4973851.f1.pdf]
